# Supplementary material for: Personalizing Breast Cancer Screening Based on Polygenic Risk and Family History
Source: PubMed Central journal article supplement — J Natl Cancer Inst. 2020 Aug 27;113(4):434–42. doi: 10.1093/jnci/djaa127 (PMC8599807; doi:10.1093/jnci/djaa127), 2020-08-27
Supplement: djaa127_supplementary_data.pdf [file djaa127_supplementary_data.pdf]

## SUPPLEMENTARY MATERIALS

### Supplementary Methods

#### **Model Erasmus University Medical Center (Model E)**

Model E, also known as MISCAN-Fadia which is an acronym for Microsimulation Screening Analysis – Fatal Diameter is a breast cancer simulation model that uses continuous tumor growth to simulate the natural history of breast cancer.(1) The model simulates individual life histories from birth to death, with and without breast cancer, in the presence and in the absence of screening and treatment. Life histories are simulated according to discrete events such as birth, tumor inception, breast cancer metastasis, and death from breast cancer or death from other causes. Model E consists of four main components: demography, natural history of breast cancer, screening, and treatment. The impact of screening on the natural history of breast cancer is assessed by simulating continuous tumor growth and the “fatal diameter” concept. This concept implies that tumors diagnosed at a size that is between the screen detection threshold and the fatal diameter are cured, while tumors diagnosed at a diameter larger than the fatal tumor diameter metastasize and lead to breast cancer death. MISCAN-Fadia includes different natural histories for molecular subtypes based on a tumor’s estrogen receptor (ER) status and human epidermal growth factor receptor (HER)-2 status.

#### **Model Georgetown University-Albert Einstein College of Medicine (Model GE)**

Model GE is a continuous-time, event-driven microsimulation of single-life histories of women utilizing a parallel universes approach.(2) The parallel universes approach starts with the generation of a basic life history for each simulated woman in the absence of any screening or adjuvant treatment. The effects of each screening and adjuvant treatment strategy under study are then simulated starting using the exact same basic life history. In this manner, the outputs for the different screening and adjuvant treatment strategies are matched pairs. The approach for simulating breast cancer natural history is phenomenological, relying on dates, stage, and age of clinical and screen detection for a tumor molecular subtype without explicitly modeling tumor growth. The model accommodates differences in natural history associated with ER and HER2 biomarkers, as well as conventional breast cancer risk factors. Breast cancer incidence depends on age, time period, and birth cohort, and is modified based on risk. The incidence includes a subset of ductal carcinoma in situ (DCIS) tumors that never surface clinically and eventually regress.

#### **Prevalence and relative risk calculation for polygenic risk score groups (313-SNP PRS)**

We modeled the distribution of risk relative to the average woman without a family history ( $RR^*$ ) as a function of polygenic risk and family history:

$$RR^* = \text{Lognormal} \left( FHx \left( \mu_i + \frac{\sigma_i}{2} \right) - \left( \frac{\sigma_i}{2} \right)^2, \sigma_i \right)$$

Where FH<sub>x</sub> is an indicator for first degree family history of breast cancer (yes=1, no=0),  $\mu_i$  is the log relative risk of family history (adjusted for polygenic effects), and  $\sigma_i$  is the log relative risk associated with a one standard deviation change in the polygenic risk score in age group *i*.

We used the following parameter values for  $\mu_i$  and  $\sigma_i$  from Mavaddat (5).

## References

1. van den Broek JJ, van Ravesteyn NT, Heijnsdijk EA, de Koning HJ. Simulating the Impact of Risk-Based Screening and Treatment on Breast Cancer Outcomes with MISCAN-Fadia. *Med Decis Making*. 2018;38(1\_suppl):54S-65S.
2. Schechter CB, Near AM, Jayasekera J, Chang Y, Mandelblatt JS. Structure, Function, and Applications of the Georgetown-Einstein (GE) Breast Cancer Simulation Model *Medical Decision Making*. 2018.
3. Gangnon RE, Sprague BL, Stout NK, Alagoz O, Weedon-Fekjaer H, Holford TR, et al. The contribution of mammography screening to breast cancer incidence trends in the United States: an updated age-period-cohort model. *Cancer Epidemiol Biomarkers Prev*. 2015;24(6):905-12.
4. Munoz D, Near AM, van Ravesteyn NT, Lee SJ, Schechter CB, Alagoz O, et al. Effects of screening and systemic adjuvant therapy on ER-specific US breast cancer mortality. *J Natl Cancer Inst*. 2014;106(11).
5. Mavaddat N, Michailidou K, Dennis J, Lush M, Fachal L, Lee A, et al. Polygenic Risk Scores for Prediction of Breast Cancer and Breast Cancer Subtypes. *Am J Hum Genet*. 2019;104(1):21-34.
6. Shiyanbola OO, Arao RF, Miglioretti DL, Sprague BL, Hampton JM, Stout NK, et al. Emerging Trends in Family History of Breast Cancer and Associated Risk. *Cancer Epidemiol Biomarkers Prev*. 2017;26(12):1753-60.
7. Gradishar WJ, Anderson BO, Balassanian R, Blair SL, Burstein HJ, Cyr A, et al. Breast Cancer, Version 4.2017, NCCN Clinical Practice Guidelines in Oncology. *J Natl Compr Canc Netw*. 2018;16(3):310-20.
8. Early Breast Cancer Trialists' Collaborative G, Peto R, Davies C, Godwin J, Gray R, Pan HC, et al. Comparisons between different polychemotherapy regimens for early breast cancer: meta-analyses of long-term outcome among 100,000 women in 123 randomised trials. *Lancet*. 2012;379(9814):432-44.
9. Gangnon RE, Stout NK, Alagoz O, Hampton JM, Sprague BL, Trentham-Dietz A. Contribution of Breast Cancer to Overall Mortality for US Women. *Med Decis Making*. 2018;38(1\_suppl):24S-31S.

## SUPPLEMENTARY TABLES

**Supplementary Table 1. Model differences and similarities.**

|                                          | <b>Erasmus (Model E)</b>                                                                                              | <b>Georgetown-Einstein (Model GE)</b>                                                                                 |
|------------------------------------------|-----------------------------------------------------------------------------------------------------------------------|-----------------------------------------------------------------------------------------------------------------------|
| <b>Model type</b>                        | Microsimulation of individual life histories                                                                          | Microsimulation of individual life histories                                                                          |
| <b>Breast cancer natural history</b>     | Continuous tumor growth of invasive tumors                                                                            | Stage transitions                                                                                                     |
| <b>Ductal carcinoma in situ</b>          | DCIS included                                                                                                         | DCIS included                                                                                                         |
| <b>ER/HER2 tumor subtypes</b>            | Yes, different natural history by ER/HER2 status                                                                      | Yes, different natural history by ER/HER2 status                                                                      |
| <b>Screen detection conditional on *</b> | Age, density, screening modality and frequency                                                                        | Age, density, screening modality and frequency                                                                        |
| <b>Screening benefit</b>                 | Detection at smaller tumor sizes                                                                                      | Shift in distribution of stage at diagnosis                                                                           |
| <b>Overdiagnosis estimation†</b>         | Total number of cancers diagnosed in the presence of screening minus the number diagnosed in the absence of screening | Total number of cancers diagnosed in the presence of screening minus the number diagnosed in the absence of screening |
| <b>Treatment benefit</b>                 | Cure fraction among diagnosed cancer                                                                                  | Hazard reduction                                                                                                      |
| <b>Death from breast cancer</b>          | Breast cancer survival vs other cause survival                                                                        | Breast cancer survival vs other cause survival                                                                        |

\* Screening only occurs in the ages specified by the screening strategy. Outside of this screening window, cancers can only be diagnosed clinically due to symptoms. This means that cancers diagnosed on the last screen would be considered screen detected. After the last age of screening only clinical cases are diagnosed. Once a woman is diagnosed with DCIS or with invasive breast cancer, she does not continue screening.

† There is consensus in the literature that the majority of all overdiagnosed cases are among DCIS diagnoses. Since the natural history of DCIS cannot be directly observed and the true progression rate of DCIS is unknown, any differences in model estimates of overdiagnoses likely reflect the uncertainty about DCIS progression rates and its natural history.

**Supplementary Table 2. Model setup and model input sources.**

|                                      | Description                                                                                                                                                                                                                                     | Source    |
|--------------------------------------|-------------------------------------------------------------------------------------------------------------------------------------------------------------------------------------------------------------------------------------------------|-----------|
| <b>Population demographics</b>       |                                                                                                                                                                                                                                                 |           |
| Birth cohort                         | All women were born in 1985.                                                                                                                                                                                                                    | -         |
| Life expectancy                      | For non-breast cancer patients all-cause mortality adjusted for breast cancer mortality determined life expectancy, among patients competing risk between breast cancer survival and other cause mortality determined life expectancy.          | SEER Stat |
| <b>Breast cancer natural history</b> |                                                                                                                                                                                                                                                 |           |
| Incidence                            | Incidence in the absence of screening derived by Gangnon et al. is used as baseline incidence to estimate the effects of screening.                                                                                                             | (3)       |
| Sojourn time                         | Model-specific, based on tumor growth, progression and screening test sensitivity.                                                                                                                                                              | (1, 2)    |
| Tumor behavior                       | Tumor growth or progression distribution was ER/HER2 subtype-specific and based on model calibration.                                                                                                                                           | (4)       |
| <b>Risk levels</b>                   |                                                                                                                                                                                                                                                 |           |
| Polygenic risk                       | 7 polygenic risk groups spanning age-specific risk level between 0 and 10 times the population average. (0-0.5, 0.5-1.0, 1.0-1.5, 1.5-2.0, 2.0-3.0, 3.0-5.0, 5.0-10.0). Risk group upper and lower cut-off levels were self-chosen.             | (5)       |
| Family history                       | 5 family history groups: women who learned in age ranges 30-39, 40-49, 50-64, 65-100 that they had a first-degree relative with breast cancer.                                                                                                  | (6)       |
| <b>Risk-factor prevalence</b>        |                                                                                                                                                                                                                                                 |           |
| Polygenic risk                       | The prevalence was calculated by simulating the distribution of risk as a function of the PRS to match that of Mavaddat et al 2019. Using the cut-off risk levels of the seven defined groups, we calculated the number of women in each group. | (5)       |
| Family history                       | The prevalence of the 5 family history groups: women who learned in age ranges 30-39, 40-49, 50-64, 65-100 that they had a first-degree relative with breast cancer.                                                                            | (6)       |
| <b>Breast cancer screening</b>       |                                                                                                                                                                                                                                                 |           |
| Screening modality                   | Digital mammography                                                                                                                                                                                                                             | -         |
| Screening performance                | Age-, first-screen-, and screening interval-specific sensitivity and specificity, and distributions of stage at diagnosis distributions reported by the Breast Cancer Surveillance Consortium among women aged 30 to 74.                        | BCSC      |
| Adherence                            | 100% adherence to each screening strategy.                                                                                                                                                                                                      | -         |
| <b>Breast cancer treatment</b>       |                                                                                                                                                                                                                                                 |           |
| Treatment types                      | Surgery followed by adjuvant hormone-, chemo- and/or trastuzumab therapy.                                                                                                                                                                       | (7)       |
| Treatment effects                    | Meta-analyses of clinical trials on breast cancer treatment effectiveness.                                                                                                                                                                      | (8)       |
| Adherence                            | 100% adherence and receipt of age- stage- and ER/HER2 specific treatment.                                                                                                                                                                       | -         |
| <b>Survival</b>                      |                                                                                                                                                                                                                                                 |           |
| Breast cancer survival               | Breast cancer survival before receipt of adjuvant treatment.                                                                                                                                                                                    | (4)       |
| Other cause survival                 | Age- and cohort-specific all-cause mortality adjusted for breast cancer mortality.                                                                                                                                                              | (9)       |

**Supplementary Table 3. Polygenic risk parameters used to calculate risk group prevalences.**

| <b>Age</b>      | <b>Sigma (<math>\sigma</math>)</b> |                           |                           |
|-----------------|------------------------------------|---------------------------|---------------------------|
|                 | <b>All cancers</b>                 | <b>ER+</b>                | <b>ER-</b>                |
| < 40            | 0.46 (0.38 – 0.53)                 | 0.56 (0.47 – 0.65)        | 0.48 (0.36 – 0.59)        |
| 40-49           | 0.46 (0.42 – 0.50)                 | 0.53 (0.48 – 0.57)        | 0.36 (0.29 – 0.43)        |
| 50-59           | 0.48 (0.45 – 0.51)                 | 0.54 (0.50 – 0.57)        | 0.37 (0.32 – 0.43)        |
| $\geq 60$       | 0.41 (0.38 – 0.43)                 | 0.44 (0.41 – 0.47)        | 0.36 (0.31 – 0.42)        |
| <i>All ages</i> | <i>0.44 (0.42 – 0.46)</i>          | <i>0.49 (0.47 - 0.51)</i> | <i>0.37 (0.34 – 0.40)</i> |

To model the distribution of risk relative to the population average, we consider  $RR = RR^*/\text{mean}(RR^*)$ , where the mean of  $RR^*$  is taken over the joint distribution of family history and polygenic risk in the population. The distributions of risk relative to the population average for various subgroups are displayed in the Supplementary figure 1:

**Supplementary Table 4. Breast cancer risk and prevalence based on the 313-SNP polygenic risk score and breast cancer family history combined.**

| <b>PREVALENCES</b> | <b>Polygenic risk score groups (low to high polygenic risk)</b> |                |                |                |                |                |                 |
|--------------------|-----------------------------------------------------------------|----------------|----------------|----------------|----------------|----------------|-----------------|
| <b>FH group</b>    | <b>0.0-0.5</b>                                                  | <b>0.5-1.0</b> | <b>1.0-1.5</b> | <b>1.5-2.0</b> | <b>2.0-3.0</b> | <b>3.0-5.0</b> | <b>5.0-10.0</b> |
| 30 < FH+ < 40      | 0.00%                                                           | 0.19%          | 0.69%          | 0.95%          | 1.53%          | 1.10%          | 0.23%           |
| 40 < FH+ < 49      | 0.06%                                                           | 0.91%          | 1.32%          | 0.91%          | 0.75%          | 0.23%          | 0.02%           |
| 50 < FH+ < 64      | 0.09%                                                           | 1.27%          | 1.86%          | 1.28%          | 1.06%          | 0.32%          | 0.03%           |
| 65 < FH+ < 100     | 0.06%                                                           | 0.65%          | 0.76%          | 0.44%          | 0.30%          | 0.08%          | 0.01%           |
| No FH in life      | 17.06%                                                          | 44.06%         | 16.07%         | 4.14%          | 1.41%          | 0.17%          | 0.00%           |

  

| <b>BREAST CANCER RISK</b> | <b>Polygenic risk score groups (low to high polygenic risk)</b> |                |                |                |                |                |                 |
|---------------------------|-----------------------------------------------------------------|----------------|----------------|----------------|----------------|----------------|-----------------|
| <b>FH group</b>           | <b>0.0-0.5</b>                                                  | <b>0.5-1.0</b> | <b>1.0-1.5</b> | <b>1.5-2.0</b> | <b>2.0-3.0</b> | <b>3.0-5.0</b> | <b>5.0-10.0</b> |
| 30 < FH+ < 40             | 0.67                                                            | 1.55           | 2.43           | 3.36           | 4.86           | 7.39           | 12.64           |
| 40 < FH+ < 49             | 0.53                                                            | 1.23           | 1.93           | 2.67           | 3.86           | 5.86           | 10.03           |
| 50 < FH+ < 64             | 0.43                                                            | 0.99           | 1.55           | 2.15           | 3.11           | 4.72           | 8.07            |
| 65 < FH+ < 100            | 0.41                                                            | 0.95           | 1.49           | 2.06           | 2.98           | 4.52           | 7.74            |
| No FH in life             | 0.24                                                            | 0.56           | 0.87           | 1.21           | 1.75           | 2.66           | 4.55            |

**Supplementary Table 5. Benefits and harms projections of mammography screening based on polygenic risk scores (313 SNPs). Outcomes for model E and model GE in () per 1,000 women screened.**

| Screening guideline                        | Screening strategy | Number of screens | Life years gained | Breast cancer deaths averted | Over diagnoses | False positives |
|--------------------------------------------|--------------------|-------------------|-------------------|------------------------------|----------------|-----------------|
| <b>PRS group 7 (5.0 &lt; RR &lt; 10.0)</b> |                    |                   |                   |                              |                |                 |
| <b>USPSTF guideline</b>                    | Biennial 50-74     | 9009 (8763)       | 361 (664)         | 21.3 (33.6)                  | 44.4 (11.6)    | 750 (702)       |
| <b>ACS guideline</b>                       | An 45-54, Bi 55-74 | 15246 (14861)     | 509 (860)         | 26.5 (39.7)                  | 58.6 (11.8)    | 1441 (1366)     |
| <b>ACR guideline</b>                       | Annual 40-74       | 25630 (25543)     | 677 (1048)        | 33.9 (46.9)                  | 82.2 (14.2)    | 2463 (2401)     |
| <b>Risk-based (this study)</b>             | Annual 30-74       | 35105 (35323)     | 763 (1154)        | 36.1 (49.4)                  | 91.9 (14.6)    | 3668 (3628)     |
| <b>PRS group 6 (3.0 &lt; RR &lt; 5.0)</b>  |                    |                   |                   |                              |                |                 |
| <b>USPSTF guideline</b>                    | Biennial 50-74     | 9889 (9905)       | 267 (436)         | 16.2 (22.4)                  | 37.9 (11.7)    | 820 (802)       |
| <b>ACS guideline</b>                       | An 45-54, Bi 55-74 | 16400 (16338)     | 363 (555)         | 19.4 (26)                    | 47.1 (12.2)    | 1539 (1505)     |
| <b>ACR guideline</b>                       | Annual 40-74       | 27841 (28173)     | 482 (673)         | 25 (30.6)                    | 66.4 (14.3)    | 2648 (2639)     |
| <b>Risk-based (this study)</b>             | Annual 35-74       | 32616 (33054)     | 517 (715)         | 26 (31.7)                    | 70.4 (14.7)    | 3255 (3252)     |
| <b>PRS group 5 (2.0 &lt; RR &lt; 3.0)</b>  |                    |                   |                   |                              |                |                 |
| <b>USPSTF guideline</b>                    | Biennial 50-74     | 10429 (10509)     | 200 (303)         | 12.2 (15.7)                  | 30.2 (11.8)    | 863 (855)       |
| <b>ACS guideline</b>                       | An 45-54, Bi 55-74 | 17085 (17106)     | 265 (385)         | 14.4 (18.1)                  | 36.7 (12.5)    | 1596 (1577)     |
| <b>ACR guideline</b>                       | Annual 40-74       | 29193 (29553)     | 352 (464)         | 18.6 (21.3)                  | 51.8 (14.5)    | 2761 (2764)     |
| <b>Risk-based (this study)</b>             | An40-50,bi50-74    | 19165 (19982)     | 281 (436)         | 14.6 (19.8)                  | 38.6 (13.8)    | 1930 (1979)     |
| <b>PRS group 4 (1.5 &lt; RR &lt; 2.0)</b>  |                    |                   |                   |                              |                |                 |
| <b>USPSTF guideline</b>                    | Biennial 50-74     | 10799 (10890)     | 148 (218)         | 9.1 (11.3)                   | 23.5 (11.9)    | 892 (889)       |
| <b>ACS guideline</b>                       | An 45-54, Bi 55-74 | 17547 (17585)     | 195 (273)         | 10.7 (13)                    | 28 (12.8)      | 1635 (1623)     |
| <b>ACR guideline</b>                       | Annual 40-74       | 30116 (30420)     | 260 (330)         | 13.9 (15.2)                  | 39.6 (14.7)    | 2837 (2841)     |
| <b>Risk-based (this study)</b>             | Biennial 40-74     | 15604 (15688)     | 191 (292)         | 10.6 (13.6)                  | 28.3 (14.1)    | 1467 (1458)     |
| <b>PRS group 3 (1.0 &lt; RR &lt; 1.5)</b>  |                    |                   |                   |                              |                |                 |
| <b>USPSTF guideline</b>                    | Biennial 50-74     | 11048 (11133)     | 113 (160)         | 7 (8.3)                      | 18.4 (12)      | 912 (911)       |
| <b>ACS guideline</b>                       | An 45-54, Bi 55-74 | 17855 (17890)     | 146 (202)         | 8.1 (9.5)                    | 21.6 (13)      | 1660 (1651)     |
| <b>ACR guideline</b>                       | Annual 40-74       | 30738 (30973)     | 195 (243)         | 10.5 (11.2)                  | 30.7 (14.8)    | 2888 (2891)     |
| <b>Risk-based (this study)</b>             | Biennial 40-74     | 15889 (15957)     | 145 (215)         | 8.1 (10)                     | 21.9 (14.4)    | 1490 (1483)     |
| <b>PRS group 2 (0.5 &lt; RR &lt; 1.0)</b>  |                    |                   |                   |                              |                |                 |
| <b>USPSTF guideline</b>                    | Biennial 50-74     | 11298 (11367)     | 75 (105)          | 4.7 (5.5)                    | 12.6 (12.1)    | 932 (932)       |
| <b>ACS guideline</b>                       | An 45-54, Bi 55-74 | 18161 (18181)     | 98 (131)          | 5.4 (6.3)                    | 14.7 (13.3)    | 1686 (1679)     |
| <b>ACR guideline</b>                       | Annual 40-74       | 31358 (31502)     | 130 (158)         | 7 (7.3)                      | 20.9 (15)      | 2939 (2938)     |
| <b>Risk-based (this study)</b>             | Biennial 50-74     | 11298 (11367)     | 75 (105)          | 4.7 (5.5)                    | 12.6 (12.1)    | 932 (932)       |
| <b>PRS group 1 (0.0 &lt; RR &lt; 0.5)</b>  |                    |                   |                   |                              |                |                 |
| <b>USPSTF guideline</b>                    | Biennial 50-74     | 11567 (11609)     | 34 (46)           | 2.1 (2.4)                    | 5.8 (12.3)     | 953 (953)       |
| <b>ACS guideline</b>                       | An 45-54, Bi 55-74 | 18486 (18481)     | 44 (57)           | 2.4 (2.7)                    | 6.7 (13.6)     | 1713 (1707)     |
| <b>ACR guideline</b>                       | Annual 40-74       | 32026 (32048)     | 59 (69)           | 3.2 (3.2)                    | 9.6 (15.2)     | 2993 (2988)     |
| <b>Risk-based (this study)</b>             | Triennial 50-74    | 8005 (8035)       | 27 (41)           | 1.7 (2.1)                    | 4.5 (12.1)     | 758 (651)       |

**Supplementary Table 6. Benefits and harms projections of mammography screening based on polygenic risk scores and breast cancer family history combined. Outcomes for model E and model GE in ( ) per 1,000 women screened.**

| Risk group based on PRS and age of Breast Cancer FH | Screening guideline | Screening strategy | Number of screens | Life years gained | Breast cancer deaths averted | Over diagnoses | False positives |
|-----------------------------------------------------|---------------------|--------------------|-------------------|-------------------|------------------------------|----------------|-----------------|
| <b>PRS group 7 (5.0 &lt; RR &lt; 10.0)</b>          |                     |                    |                   |                   |                              |                |                 |
| FH+ 30-39                                           | USPSTF              | Biennial 50-74     | 8093 (7417)       | 313 (774)         | 18.2 (38.6)                  | 37 (10.9)      | 675 (589)       |
|                                                     | ACS                 | Annual 30-74       | 32362 (31822)     | 903 (1550)        | 38.5 (62.5)                  | 96.2 (13.7)    | 3419 (3293)     |
|                                                     | ACR                 | An 45-54, Bi 55-74 | 23305 (22228)     | 736 (1334)        | 34.2 (57.4)                  | 78.7 (13.4)    | 2257 (2095)     |
|                                                     | Risk-based          | Annual 30-74       | 13928 (12915)     | 520 (1057)        | 25.7 (47.6)                  | 53.8 (11)      | 1323 (1184)     |
| FH+ 40-49                                           | USPSTF              | Biennial 50-74     | 8413 (7716)       | 335 (805)         | 19.4 (40.2)                  | 40.6 (11.3)    | 701 (612)       |
|                                                     | ACS                 | Annual 30-74       | 33415 (32912)     | 826 (1513)        | 37.1 (62.7)                  | 99 (14.2)      | 3522 (3407)     |
|                                                     | ACR                 | An 45-54, Bi 55-74 | 24073 (23123)     | 732 (1391)        | 34.6 (59.8)                  | 86.3 (14)      | 2330 (2179)     |
|                                                     | Risk-based          | Annual 30-74       | 14436 (13435)     | 538 (1097)        | 26.6 (49.3)                  | 59.3 (11.5)    | 1371 (1231)     |
| FH+ 50-64                                           | USPSTF              | Biennial 50-74     | 8876 (8289)       | 327 (865)         | 19.4 (43.2)                  | 47.4 (12.2)    | 740 (658)       |
|                                                     | ACS                 | Annual 30-74       | 34847 (34391)     | 720 (1381)        | 34.2 (60.4)                  | 97.3 (15.1)    | 3650 (3550)     |
|                                                     | ACR                 | An 45-54, Bi 55-74 | 25336 (24595)     | 641 (1283)        | 32.2 (58)                    | 88.4 (14.8)    | 2441 (2321)     |
|                                                     | Risk-based          | Annual 30-74       | 15108 (14389)     | 475 (1096)        | 24.6 (50.5)                  | 64.6 (12.2)    | 1431 (1322)     |
| FH+ 65+                                             | USPSTF              | Biennial 50-74     | 9169 (8904)       | 288 (702)         | 17.5 (37.2)                  | 46.5 (12.6)    | 763 (713)       |
|                                                     | ACS                 | Annual 30-74       | 35564 (35681)     | 659 (1155)        | 31.5 (52.1)                  | 93.4 (15.6)    | 3708 (3663)     |
|                                                     | ACR                 | An 45-54, Bi 55-74 | 26053 (25886)     | 580 (1056)        | 29.5 (49.7)                  | 84.4 (15.3)    | 2499 (2434)     |
|                                                     | Risk-based          | Annual 30-74       | 15489 (15115)     | 419 (872)         | 22.1 (42.2)                  | 59.6 (12.5)    | 1462 (1389)     |
| No BC FH                                            | USPSTF              | Biennial 50-74     | 9286 (9112)       | 263 (572)         | 15.7 (28.8)                  | 39.6 (11.4)    | 772 (733)       |
|                                                     | ACS                 | Annual 30-74       | 35837 (36112)     | 622 (1011)        | 29 (42.9)                    | 83.5 (14.4)    | 3729 (3699)     |
|                                                     | ACR                 | An 45-54, Bi 55-74 | 26327 (26325)     | 543 (911)         | 26.9 (40.5)                  | 74.5 (14)      | 2520 (2471)     |
|                                                     | Risk-based          | Annual 30-74       | 15595 (15286)     | 395 (743)         | 20.3 (34.2)                  | 52.5 (11.8)    | 1470 (1406)     |
| <b>PRS group 6 (3.0 &lt; RR &lt; 5.0)</b>           |                     |                    |                   |                   |                              |                |                 |
| FH+ 30-39                                           | USPSTF              | Biennial 50-74     | 9117 (8979)       | 258 (545)         | 15.4 (27.6)                  | 37.4 (11.2)    | 758 (723)       |
|                                                     | ACS                 | Annual 30-74       | 35293 (35662)     | 663 (1030)        | 29.9 (42.8)                  | 83.1 (14.2)    | 3678 (3653)     |
|                                                     | ACR                 | An 45-54, Bi 55-74 | 25892 (25930)     | 561 (902)         | 27.3 (39.8)                  | 72.2 (13.8)    | 2480 (2433)     |
|                                                     | Risk-based          | Annual 30-74       | 15337 (15039)     | 400 (722)         | 20.4 (33.1)                  | 50.1 (11.5)    | 1446 (1383)     |
| FH+ 40-49                                           | USPSTF              | Biennial 50-74     | 9365 (9188)       | 268 (557)         | 15.9 (28.2)                  | 39.5 (11.4)    | 778 (740)       |
|                                                     | ACS                 | Annual 30-74       | 31196 (31419)     | 587 (975)         | 28.2 (41.9)                  | 81.8 (14.4)    | 3135 (3102)     |
|                                                     | ACR                 | An 45-54, Bi 55-74 | 26499 (26534)     | 546 (922)         | 27.1 (40.6)                  | 75.9 (14.1)    | 2536 (2489)     |
|                                                     | Risk-based          | Annual 35-74       | 15717 (15389)     | 403 (738)         | 20.6 (33.9)                  | 53 (11.8)      | 1481 (1415)     |
| FH+ 50-64                                           | USPSTF              | Biennial 50-74     | 9744 (9579)       | 250 (580)         | 15.3 (29.4)                  | 43.1 (11.9)    | 809 (772)       |
|                                                     | ACS                 | Annual 30-74       | 32308 (32409)     | 501 (875)         | 25.4 (39.7)                  | 78.8 (14.9)    | 3233 (3198)     |
|                                                     | ACR                 | An 45-54, Bi 55-74 | 27516 (27519)     | 469 (837)         | 24.6 (38.7)                  | 75.1 (14.6)    | 2625 (2583)     |
|                                                     | Risk-based          | Annual 35-74       | 16253 (16018)     | 347 (718)         | 18.6 (33.7)                  | 54.5 (12.2)    | 1528 (1475)     |
| FH+ 65+                                             | USPSTF              | Biennial 50-74     | 9999 (9996)       | 215 (462)         | 13.4 (24.9)                  | 40.5 (12.1)    | 829 (809)       |
|                                                     | ACS                 | Annual 30-74       | 32925 (33282)     | 444 (717)         | 22.7 (33.6)                  | 73.3 (15.1)    | 3282 (3274)     |
|                                                     | ACR                 | An 45-54, Bi 55-74 | 28132 (28393)     | 412 (679)         | 21.8 (32.7)                  | 69.7 (14.8)    | 2674 (2660)     |
|                                                     | Risk-based          | Annual 35-74       | 16569 (16501)     | 297 (565)         | 16.2 (27.8)                  | 48.9 (12.4)    | 1553 (1520)     |
| No BC FH                                            | USPSTF              | Biennial 50-74     | 10110 (10137)     | 190 (371)         | 11.6 (18.9)                  | 32.2 (11.6)    | 838 (823)       |
|                                                     | ACS                 | Annual 30-74       | 33186 (33572)     | 408 (617)         | 20.1 (27)                    | 61.4 (14.7)    | 3302 (3299)     |
|                                                     | ACR                 | An 45-54, Bi 55-74 | 28394 (28688)     | 376 (580)         | 19.3 (26.1)                  | 57.7 (14.3)    | 2693 (2685)     |
|                                                     | Risk-based          | Annual 35-74       | 16667 (16614)     | 274 (476)         | 14.5 (22.1)                  | 40.7 (12.3)    | 1561 (1531)     |
| <b>PRS group 5 (2.0 &lt; RR &lt; 3.0)</b>           |                     |                    |                   |                   |                              |                |                 |
| FH+ 30-39                                           | USPSTF              | Biennial 50-74     | 9812 (9849)       | 204 (392)         | 12.4 (20)                    | 32.8 (11.4)    | 814 (799)       |
|                                                     | ACS                 | Annual 30-74       | 37225 (37764)     | 496 (722)         | 23.1 (30.4)                  | 68 (14.6)      | 3845 (3848)     |
|                                                     | ACR                 | An 45-54, Bi 55-74 | 27641 (27967)     | 427 (637)         | 21.3 (28.4)                  | 60.6 (14)      | 2628 (2618)     |
|                                                     | Risk-based          | Annual 30-74       | 16258 (16193)     | 306 (513)         | 15.9 (23.8)                  | 42.1 (12)      | 1525 (1492)     |
| FH+ 40-49                                           | USPSTF              | Biennial 50-74     | 10005 (9999)      | 207 (398)         | 12.6 (20.3)                  | 34 (11.6)      | 829 (811)       |
|                                                     | ACS                 | Annual 30-74       | 28112 (28395)     | 411 (647)         | 20.9 (28.9)                  | 62.5 (14.2)    | 2671 (2658)     |
|                                                     | ACR                 | An 45-54, Bi 55-74 | 28112 (28395)     | 411 (647)         | 20.9 (28.9)                  | 62.5 (14.2)    | 2671 (2658)     |
|                                                     | Risk-based          | Annual 40-74       | 16545 (16440)     | 304 (521)         | 15.9 (24.1)                  | 43.6 (12.2)    | 1551 (1515)     |
| FH+ 50-64                                           | USPSTF              | Biennial 50-74     | 10301 (10277)     | 191 (409)         | 11.8 (20.9)                  | 35.8 (11.9)    | 854 (834)       |
|                                                     | ACS                 | Annual 30-74       | 19055 (19772)     | 269 (546)         | 14.2 (25.3)                  | 44.5 (13.7)    | 1922 (1959)     |



|                                           |            |                    |               |           |             |             |             |
|-------------------------------------------|------------|--------------------|---------------|-----------|-------------|-------------|-------------|
|                                           | ACR        | An 45-54, Bi 55-74 | 28904 (29087) | 348 (583) | 18.7 (27.3) | 60.5 (14.6) | 2739 (2724) |
|                                           | Risk-based | An 40-50, Bi 50-74 | 16957 (16880) | 257 (504) | 14 (23.8)   | 43.7 (12.5) | 1587 (1556) |
| FH+ 65+                                   | USPSTF     | Biennial 50-74     | 10507 (10572) | 161 (323) | 10.2 (17.5) | 32.9 (12)   | 870 (860)   |
|                                           | ACS        | Annual 30-74       | 19275 (20084) | 235 (440) | 12.4 (21.1) | 40.2 (13.8) | 1940 (1988) |
|                                           | ACR        | An 45-54, Bi 55-74 | 29398 (29707) | 302 (470) | 16.3 (22.8) | 55.2 (14.7) | 2779 (2778) |
|                                           | Risk-based | An 40-50, Bi 50-74 | 17206 (17219) | 218 (391) | 12 (19.4)   | 38.5 (12.5) | 1607 (1588) |
| No BC FH                                  | USPSTF     | Biennial 50-74     | 10599 (10671) | 140 (256) | 8.6 (13.1)  | 25.2 (11.8) | 876 (870)   |
|                                           | ACS        | Annual 30-74       | 19356 (20174) | 214 (373) | 10.9 (16.8) | 32.8 (13.9) | 1946 (1997) |
|                                           | ACR        | An 45-54, Bi 55-74 | 29617 (29913) | 270 (397) | 14.1 (18)   | 44.1 (14.5) | 2795 (2796) |
|                                           | Risk-based | An 40-50, Bi 50-74 | 17287 (17297) | 197 (328) | 10.5 (15.3) | 31 (12.6)   | 1613 (1596) |
| <b>PRS group 4 (1.5 &lt; RR &lt; 2.0)</b> |            |                    |               |           |             |             |             |
| FH+ 30-39                                 | USPSTF     | Biennial 50-74     | 10319 (10412) | 158 (285) | 9.7 (14.7)  | 27.1 (11.6) | 854 (848)   |
|                                           | ACS        | Annual 30-74       | 28744 (29630) | 309 (492) | 14.1 (20.6) | 41.9 (14.3) | 3146 (3196) |
|                                           | ACR        | An 45-54, Bi 55-74 | 28911 (29277) | 323 (459) | 16.4 (20.6) | 48.7 (14.3) | 2735 (2737) |
|                                           | Risk-based | An 30-50, Bi 50-74 | 16913 (16930) | 232 (372) | 12.2 (17.3) | 33.9 (12.4) | 1581 (1561) |
| FH+ 40-49                                 | USPSTF     | Biennial 50-74     | 10466 (10521) | 159 (288) | 9.7 (14.8)  | 27.8 (11.7) | 866 (857)   |
|                                           | ACS        | Annual 30-74       | 19196 (19997) | 246 (438) | 12.4 (19.4) | 37.3 (13.8) | 1933 (1979) |
|                                           | ACR        | An 45-54, Bi 55-74 | 29271 (29585) | 310 (465) | 16 (20.9)   | 49.7 (14.4) | 2767 (2766) |
|                                           | Risk-based | An 40-50, Bi 50-74 | 17128 (17108) | 228 (375) | 12.1 (17.5) | 34.7 (12.5) | 1600 (1577) |
| FH+ 50-64                                 | USPSTF     | Biennial 50-74     | 10694 (10722) | 145 (295) | 9 (15.2)    | 28.5 (11.9) | 885 (873)   |
|                                           | ACS        | Annual 30-74       | 15501 (15530) | 184 (372) | 10.4 (17.6) | 33.5 (13.9) | 1459 (1443) |
|                                           | ACR        | An 45-54, Bi 55-74 | 29880 (30083) | 260 (418) | 14.2 (19.7) | 47.5 (14.7) | 2819 (2813) |
|                                           | Risk-based | Biennial 40-74     | 17443 (17422) | 191 (361) | 10.6 (17.1) | 34.1 (12.7) | 1627 (1607) |
| FH+ 65+                                   | USPSTF     | Biennial 50-74     | 10855 (10935) | 121 (231) | 7.7 (12.5)  | 25.9 (12)   | 897 (892)   |
|                                           | ACS        | Annual 30-74       | 15672 (15745) | 159 (296) | 9 (14.6)    | 30.2 (14.1) | 1473 (1463) |
|                                           | ACR        | An 45-54, Bi 55-74 | 30264 (30529) | 224 (335) | 12.2 (16.3) | 42.7 (14.8) | 2850 (2852) |
|                                           | Risk-based | Biennial 40-74     | 17634 (17666) | 161 (280) | 9 (13.9)    | 29.7 (12.8) | 1642 (1630) |
| No BC FH                                  | USPSTF     | Biennial 50-74     | 10928 (11006) | 103 (183) | 6.4 (9.4)   | 19.3 (11.9) | 903 (900)   |
|                                           | ACS        | Annual 30-74       | 15746 (15812) | 141 (249) | 7.7 (11.4)  | 23.5 (14.2) | 1478 (1469) |
|                                           | ACR        | An 45-54, Bi 55-74 | 30439 (30677) | 198 (281) | 10.4 (12.8) | 33.3 (14.7) | 2863 (2864) |
|                                           | Risk-based | Biennial 40-74     | 17699 (17721) | 144 (232) | 7.7 (10.9)  | 23.4 (12.9) | 1647 (1636) |
| <b>PRS group 3 (1.0 &lt; RR &lt; 1.5)</b> |            |                    |               |           |             |             |             |
| FH+ 30-39                                 | USPSTF     | Biennial 50-74     | 10319 (10778) | 158 (213) | 9.7 (11)    | 27.1 (11.8) | 854 (880)   |
|                                           | ACS        | Annual 30-74       | 19926 (20478) | 263 (327) | 13 (14.3)   | 37.9 (14.7) | 2037 (2065) |
|                                           | ACR        | An 45-54, Bi 55-74 | 29799 (30125) | 247 (341) | 12.7 (15.4) | 38.8 (14.5) | 2809 (2813) |
|                                           | Risk-based | Biennial 30-74     | 17365 (17405) | 178 (276) | 9.4 (12.9)  | 27 (12.7)   | 1619 (1606) |
| FH+ 40-49                                 | USPSTF     | Biennial 50-74     | 10466 (10859) | 159 (216) | 9.7 (11.1)  | 27.8 (11.9) | 866 (887)   |
|                                           | ACS        | Annual 30-74       | 15212 (15656) | 220 (304) | 11.8 (13.8) | 35.2 (14.1) | 1435 (1455) |
|                                           | ACR        | An 45-54, Bi 55-74 | 30078 (30353) | 236 (344) | 12.3 (15.5) | 39.3 (14.6) | 2834 (2835) |
|                                           | Risk-based | Biennial 40-74     | 17529 (17537) | 174 (279) | 9.3 (13)    | 27.4 (12.8) | 1633 (1618) |
| FH+ 50-64                                 | USPSTF     | Biennial 50-74     | 10694 (11009) | 145 (218) | 9 (11.2)    | 28.5 (12)   | 885 (899)   |
|                                           | ACS        | Annual 30-74       | 13370 (13063) | 171 (253) | 10.2 (12.2) | 32.8 (12.9) | 1199 (1167) |
|                                           | ACR        | An 45-54, Bi 55-74 | 30547 (30722) | 198 (308) | 10.8 (14.5) | 37.3 (14.8) | 2874 (2870) |
|                                           | Risk-based | Biennial 45-74     | 17771 (17769) | 145 (266) | 8 (12.7)    | 26.7 (12.9) | 1654 (1640) |
| FH+ 65+                                   | USPSTF     | Biennial 50-74     | 10855 (11166) | 121 (171) | 7.7 (9.3)   | 25.9 (12.1) | 897 (913)   |
|                                           | ACS        | Annual 30-74       | 13551 (13217) | 145 (196) | 8.8 (9.9)   | 29.5 (12.9) | 1213 (1181) |
|                                           | ACR        | An 45-54, Bi 55-74 | 30847 (31053) | 168 (246) | 9.3 (12)    | 33.2 (14.9) | 2897 (2898) |
|                                           | Risk-based | Biennial 45-74     | 17920 (17949) | 121 (206) | 6.8 (10.3)  | 23 (13)     | 1666 (1657) |
| No BC FH                                  | USPSTF     | Biennial 50-74     | 10928 (11219) | 103 (135) | 6.4 (6.9)   | 19.3 (12.1) | 903 (918)   |
|                                           | ACS        | Annual 30-74       | 13635 (13259) | 126 (162) | 7.3 (7.7)   | 22.6 (13.1) | 1219 (1185) |
|                                           | ACR        | An 45-54, Bi 55-74 | 30986 (31162) | 148 (207) | 7.8 (9.4)   | 25.5 (14.9) | 2908 (2908) |
|                                           | Risk-based | Biennial 45-74     | 17971 (17990) | 107 (171) | 5.8 (8)     | 17.9 (13.2) | 1670 (1661) |
| <b>PRS group 2 (0.5 &lt; RR &lt; 1.0)</b> |            |                    |               |           |             |             |             |
| FH+ 30-39                                 | USPSTF     | Biennial 50-74     | 11041 (11133) | 85 (141)  | 5.2 (7.3)   | 15.7 (12)   | 911 (911)   |
|                                           | ACS        | Annual 30-74       | 18652 (18051) | 132 (205) | 6.9 (9.1)   | 21.2 (14.6) | 1833 (1777) |
|                                           | ACR        | An 45-54, Bi 55-74 | 30714 (30946) | 168 (223) | 8.7 (10.1)  | 27.3 (14.8) | 2884 (2888) |
|                                           | Risk-based | Biennial 35-74     | 17826 (17864) | 120 (183) | 6.4 (8.6)   | 19 (13.1)   | 1657 (1649) |
| FH+ 40-49                                 | USPSTF     | Biennial 50-74     | 11117 (11187) | 84 (141)  | 5.2 (7.3)   | 15.8 (12)   | 918 (916)   |
|                                           | ACS        | Annual 30-74       | 15964 (16017) | 113 (198) | 6.2 (9)     | 19.4 (14.4) | 1496 (1489) |
|                                           | ACR        | An 45-54, Bi 55-74 | 30903 (31095) | 160 (224) | 8.4 (10.2)  | 27.5 (14.9) | 2901 (2902) |
|                                           | Risk-based | Biennial 40-74     | 17938 (17950) | 117 (183) | 6.3 (8.5)   | 19.2 (13.1) | 1667 (1657) |
| FH+ 50-64                                 | USPSTF     | Biennial 50-74     | 11238 (11285) | 75 (143)  | 4.7 (7.4)   | 15.8 (12.1) | 927 (924)   |
|                                           | ACS        | Annual 30-74       | 11238 (11285) | 75 (143)  | 4.7 (7.4)   | 15.8 (12.1) | 927 (924)   |
|                                           | ACR        | An 45-54, Bi 55-74 | 31223 (31337) | 133 (200) | 7.3 (9.5)   | 25.8 (15)   | 2929 (2925) |

|                                           |            |                    |               |           |           |             |             |
|-------------------------------------------|------------|--------------------|---------------|-----------|-----------|-------------|-------------|
|                                           | Risk-based | Biennial 50-74     | 18102 (18102) | 98 (173)  | 5.5 (8.3) | 18.3 (13.2) | 1682 (1671) |
| FH+ 65+                                   | USPSTF     | Biennial 50-74     | 11325 (11389) | 62 (111)  | 4 (6.1)   | 14.1 (12.2) | 934 (933)   |
|                                           | ACS        | Annual 30-74       | 11325 (11389) | 62 (111)  | 4 (6.1)   | 14.1 (12.2) | 934 (933)   |
|                                           | ACR        | An 45-54, Bi 55-74 | 31430 (31554) | 112 (160) | 6.3 (7.9) | 22.9 (15)   | 2945 (2944) |
|                                           | Risk-based | Biennial 50-74     | 18203 (18220) | 80 (134)  | 4.5 (6.7) | 15.8 (13.2) | 1690 (1682) |
| No BC FH                                  | USPSTF     | Biennial 50-74     | 11365 (11423) | 52 (87)   | 3.2 (4.5) | 10.1 (12.2) | 937 (936)   |
|                                           | ACS        | Annual 30-74       | 11365 (11423) | 52 (87)   | 3.2 (4.5) | 10.1 (12.2) | 937 (936)   |
|                                           | ACR        | An 45-54, Bi 55-74 | 31527 (31625) | 98 (133)  | 5.2 (6.1) | 17.2 (15)   | 2952 (2950) |
|                                           | Risk-based | Biennial 50-74     | 18239 (18246) | 71 (110)  | 3.9 (5.2) | 12.1 (13.4) | 1692 (1685) |
| <b>PRS group 1 (0.0 &lt; RR &lt; 0.5)</b> |            |                    |               |           |           |             |             |
| FH+ 30-39                                 | USPSTF     | Biennial 50-74     | 11447 (11505) | 39 (62)   | 2.4 (3.2) | 7.6 (12.2)  | 944 (944)   |
|                                           | ACS        | Annual 30-74       | 14742 (14019) | 47 (76)   | 2.5 (3.4) | 7.8 (14.9)  | 1724 (1431) |
|                                           | ACR        | An 45-54, Bi 55-74 | 31728 (31803) | 77 (98)   | 4 (4.5)   | 13 (15.1)   | 2968 (2965) |
|                                           | Risk-based | Annual 30-74       | 18333 (18341) | 56 (80)   | 3 (3.8)   | 9 (13.5)    | 1700 (1694) |
| FH+ 40-49                                 | USPSTF     | Triennial 30-74    | 11483 (11529) | 39 (62)   | 2.4 (3.2) | 7.6 (12.2)  | 946 (946)   |
|                                           | ACS        | Annual 30-74       | 10983 (10986) | 38 (74)   | 2.1 (3.4) | 6.7 (14.3)  | 1218 (1044) |
|                                           | ACR        | An 45-54, Bi 55-74 | 31815 (31869) | 73 (99)   | 3.8 (4.5) | 13 (15.1)   | 2976 (2971) |
|                                           | Risk-based | Triennial 40-74    | 18384 (18379) | 53 (80)   | 2.9 (3.8) | 9 (13.5)    | 1704 (1698) |
| FH+ 50-64                                 | USPSTF     | Biennial 50-74     | 11538 (11572) | 35 (63)   | 2.2 (3.3) | 7.4 (12.3)  | 951 (950)   |
|                                           | ACS        | Annual 30-74       | 7987 (8012)   | 26 (56)   | 1.7 (2.9) | 5.7 (12.1)  | 756 (649)   |
|                                           | ACR        | An 45-54, Bi 55-74 | 31962 (31976) | 61 (88)   | 3.4 (4.2) | 12 (15.2)   | 2988 (2982) |
|                                           | Risk-based | Triennial 50-75    | 18459 (18446) | 44 (76)   | 2.5 (3.6) | 8.5 (13.5)  | 1711 (1704) |
| FH+ 65+                                   | USPSTF     | Biennial 50-74     | 11578 (11618) | 28 (49)   | 1.8 (2.7) | 6.6 (12.3)  | 954 (954)   |
|                                           | ACS        | Annual 30-74       | 8012 (8042)   | 22 (43)   | 1.4 (2.4) | 5 (12.1)    | 758 (652)   |
|                                           | ACR        | An 45-54, Bi 55-74 | 32057 (32071) | 51 (69)   | 2.8 (3.4) | 10.6 (15.2) | 2996 (2990) |
|                                           | Risk-based | Triennial 50-75    | 18505 (18498) | 36 (58)   | 2.1 (2.9) | 7.3 (13.6)  | 1714 (1709) |
| No BC FH                                  | USPSTF     | Biennial 50-74     | 11597 (11633) | 24 (38)   | 1.5 (2)   | 4.6 (12.3)  | 955 (955)   |
|                                           | ACS        | Annual 30-74       | 8024 (8051)   | 18 (34)   | 1.1 (1.7) | 3.6 (12.1)  | 759 (653)   |
|                                           | ACR        | An 45-54, Bi 55-74 | 32103 (32102) | 44 (58)   | 2.3 (2.7) | 7.8 (15.2)  | 2999 (2993) |
|                                           | Risk-based | Triennial 50-75    | 18522 (18509) | 32 (48)   | 1.7 (2.3) | 5.4 (13.6)  | 1716 (1710) |

**Supplementary Table 7. Benefits and harms projections of mammography screening based on breast cancer family history. Outcomes for model E and model GE in () per 1,000 women screened.**

| <b>Risk group based on family history (FH) of breast cancer</b> | <b>Screening guideline</b> | <b>Screening strategy</b> | <b>Nr. of screens</b> | <b>Life years gained *</b> | <b>Breast cancer deaths averted *</b> | <b>Over diagnoses</b> | <b>False positives</b> |
|-----------------------------------------------------------------|----------------------------|---------------------------|-----------------------|----------------------------|---------------------------------------|-----------------------|------------------------|
| Positive FH ages 30-39                                          | USPSTF guideline:          | Biennial 50-74            | 10754 (10875)         | 142 (195)                  | 8.6 (10)                              | 21.2 (11.9)           | 889 (895)              |
|                                                                 | ACS guideline:             | An 45-54, Bi 55-74        | 17467 (17531)         | 192 (251)                  | 10.3 (11.7)                           | 25.7 (12.8)           | 1627 (1618)            |
|                                                                 | ACR guideline:             | Annual 40-74              | 29996 (30349)         | 259 (310)                  | 13.5 (14)                             | 36.7 (14.6)           | 2825 (2834)            |
|                                                                 | Risk-based (this study)    | Biennial 30-74            | 20466 (20590)         | 212 (297)                  | 10.9 (13)                             | 28.5 (14.9)           | 2083 (2076)            |
| Positive FH ages 40-49                                          | USPSTF guideline:          | Biennial 50-74            | 10859 (10949)         | 141 (195)                  | 8.6 (10.1)                            | 21.4 (12.1)           | 897 (906)              |
|                                                                 | ACS guideline:             | An 45-54, Bi 55-74        | 17619 (17650)         | 189 (252)                  | 10.2 (11.8)                           | 26 (12.9)             | 1641 (1629)            |
|                                                                 | ACR guideline:             | Annual 40-74              | 30255 (30556)         | 248 (311)                  | 13.1 (14.1)                           | 37.1 (14.7)           | 2848 (2853)            |
|                                                                 | Risk-based (this study)    | Biennial 40-74            | 15670 (15755)         | 183 (274)                  | 10 (12.5)                             | 26.4 (14.1)           | 1472 (1464)            |
| Positive FH ages 50-64                                          | USPSTF guideline:          | Biennial 50-74            | 11025 (11084)         | 126 (197)                  | 7.9 (10.2)                            | 21.6 (12.1)           | 911 (906)              |
|                                                                 | ACS guideline:             | An 45-54, Bi 55-74        | 17846 (17860)         | 158 (240)                  | 8.9 (11.5)                            | 25.1 (13)             | 1660 (1649)            |
|                                                                 | ACR guideline:             | Annual 40-74              | 30692 (30891)         | 209 (279)                  | 11.6 (13.2)                           | 35 (14.8)             | 2885 (2885)            |
|                                                                 | Risk-based (this study)    | Biennial 50-74            | 11025 (11084)         | 126 (197)                  | 7.9 (10.2)                            | 21.6 (13)             | 911 (1649)             |
| Positive FH ages 65+                                            | USPSTF guideline:          | Biennial 50-74            | 11143 (11227)         | 104 (154)                  | 6.6 (8.4)                             | 19.3 (12.1)           | 920 (919)              |
|                                                                 | ACS guideline:             | An 45-54, Bi 55-74        | 17984 (18024)         | 131 (185)                  | 7.4 (9.3)                             | 21.7 (13.1)           | 1671 (1664)            |
|                                                                 | ACR guideline:             | Annual 40-74              | 30975 (31191)         | 177 (222)                  | 9.9 (10.9)                            | 31.1 (14.9)           | 2908 (2911)            |
|                                                                 | Risk-based (this study)    | Biennial 50-74            | 11143 (11227)         | 104 (154)                  | 6.6 (8.4)                             | 19.3 (12.1)           | 920 (919)              |
| No BC FH in lifetime                                            | USPSTF guideline:          | Biennial 50-74            | 11197 (11275)         | 88 (122)                   | 5.4 (6.2)                             | 14.1 (13.1)           | 924 (1664)             |
|                                                                 | ACS guideline:             | An 45-54, Bi 55-74        | 18032 (18060)         | 116 (154)                  | 6.3 (7.2)                             | 16.8 (13.2)           | 1675 (1668)            |
|                                                                 | ACR guideline:             | Annual 40-74              | 31105 (31289)         | 155 (186)                  | 8.3 (8.5)                             | 23.8 (14.9)           | 2918 (2919)            |
|                                                                 | Risk-based (this study)    | Biennial 50-74            | 11197 (11275)         | 88 (122)                   | 5.4 (6.2)                             | 14.1 (12.1)           | 924 (923)              |

## SUPPLEMENTARY FIGURES

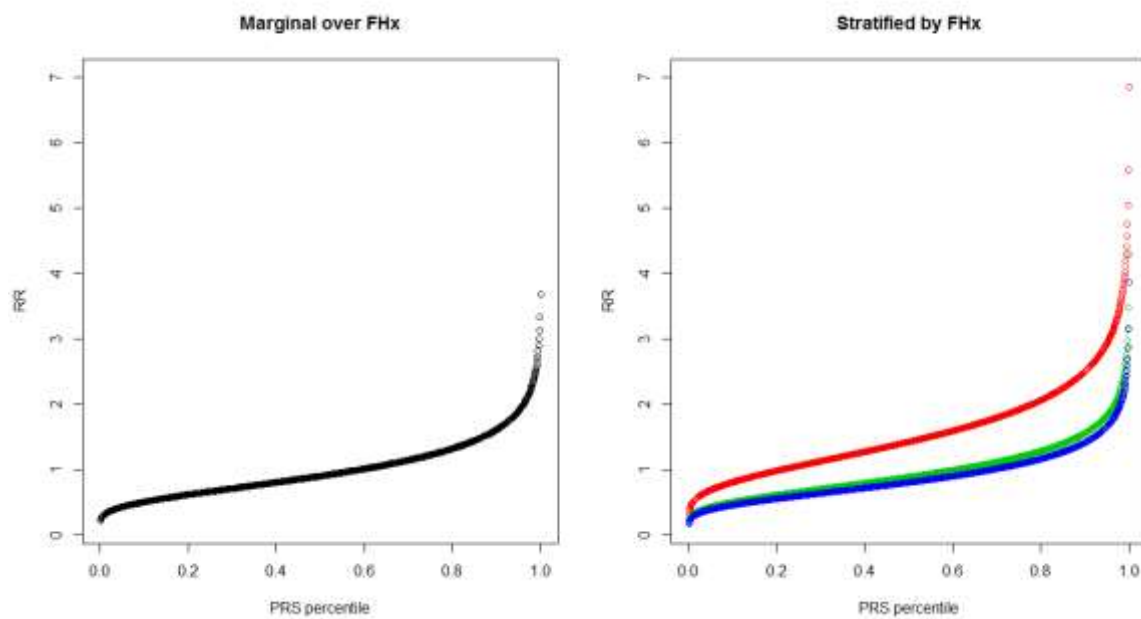

**Figure 1: Distribution of breast cancer relative risk as a function of PRS (left) and family history + PRS (right). Red represents FH+ < age 40 women, green: FH+ between ages 40 and 65, blue: no FH in life.**
